# Supplementary material
Source: publisher site journal article supplement (https://www.dovepress.com/article/371020)
Supplement: Supplementary file 1 [file get_supplementary_file.php]

**Preclinical Pharmacokinetics, Tissue Distribution and *In Vitro* Metabolism of FHND6091, a novel oral proteasome inhibitor**

Xu Yang1, Amin Liu1, Lin Yang1, Tiantian Wen2, Jia Wang3, Jingmiao Shi3, Hui Zhou2, Zhimeng Chen1, Meng Lei1,*, Yongqiang Zhu2,*

1 College of Science, Nanjing Forestry University, Nanjing, PR China.

2 College of Life Science, Nanjing Normal University, Nanjing, PR China.

3 Jiangsu Chia Tai Fenghai Pharmaceutical Co. Ltd., Nanjing, PR China

* **Correspondence:**

hk-lm@163.com (M. Lei), Tel.: +86 25 85427621

[zhyqscu@hotmail.com](mailto:zhyqscu@hotmail.com) (Y.Q. Zhu), Tel.: +86 25 85891591.

**METHODS**

**UPLC-Q-TOF/MS**

Data were acquired using a UPLC quadrupole time-of-flight mass spectrometry (Q-TOF/MS) system. UPLC analysis was performed in a Shimadzu Nextera UPLC (Shimadzu Corp., Kyoto, Japan). The samples (7 µL) were injected into an Acquity™ T3 C18 column (100 × 2.1 mm; 1.8 µm). The column temperature was set at 40 ℃, and the flow rate was 0.35 mL/min. UV-vis detection wavelengths were set at 254 nm. The gradient system consisted of 0.1% formic acid in 5 mM ammonium acetate in mobile phase A and acetonitrile in mobile phase B (0-1 min, A, 90%; 1-7.5 min, A, 50%; 7.5-10.5 min, A, 5%; 10.5-15 min, A, 90%).

MS was performed on a Triple TOF 6000 mass spectrometer (SCIEX). Electrospray ionization (ESI) source was used for mass spectrometric detection in negative ionization mode. The ESI source conditions were: Ion Source Gas1 (Gas1) as 55, Ion Source Gas2 (Gas2) as 50, curta in gas (CUR) as 40, source temperature: 500 ℃, Ion Spray Voltage Floating (ISVF) - 4000 V, and TOF MS scan m/z range: 80-1000 Da. For product ion scans, collision energy was -30 ± 10 eV. In addition, auto calibration delivery system (CDS) regulated MS/MS automatically.

**Supplementary material**

**Supplementary Figures**


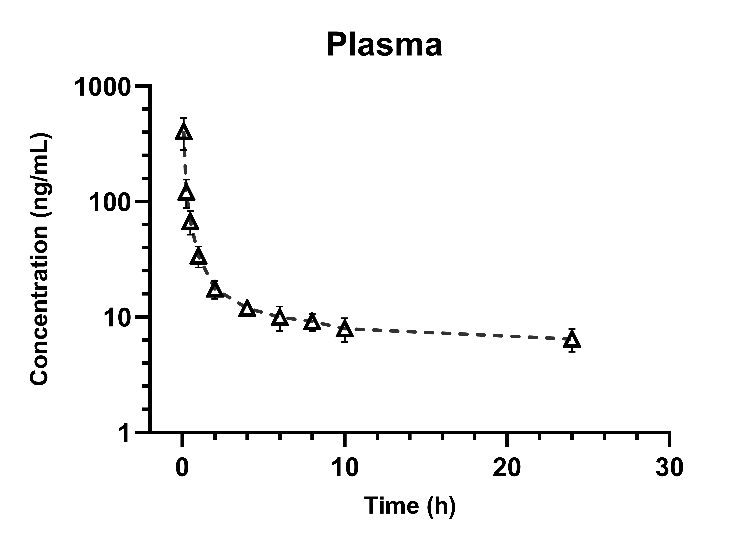


**Supplementary Figure 1.** The mean plasma concentration-time curve of FHND6081 in rats (n=6) following a single intravenous injection.

**
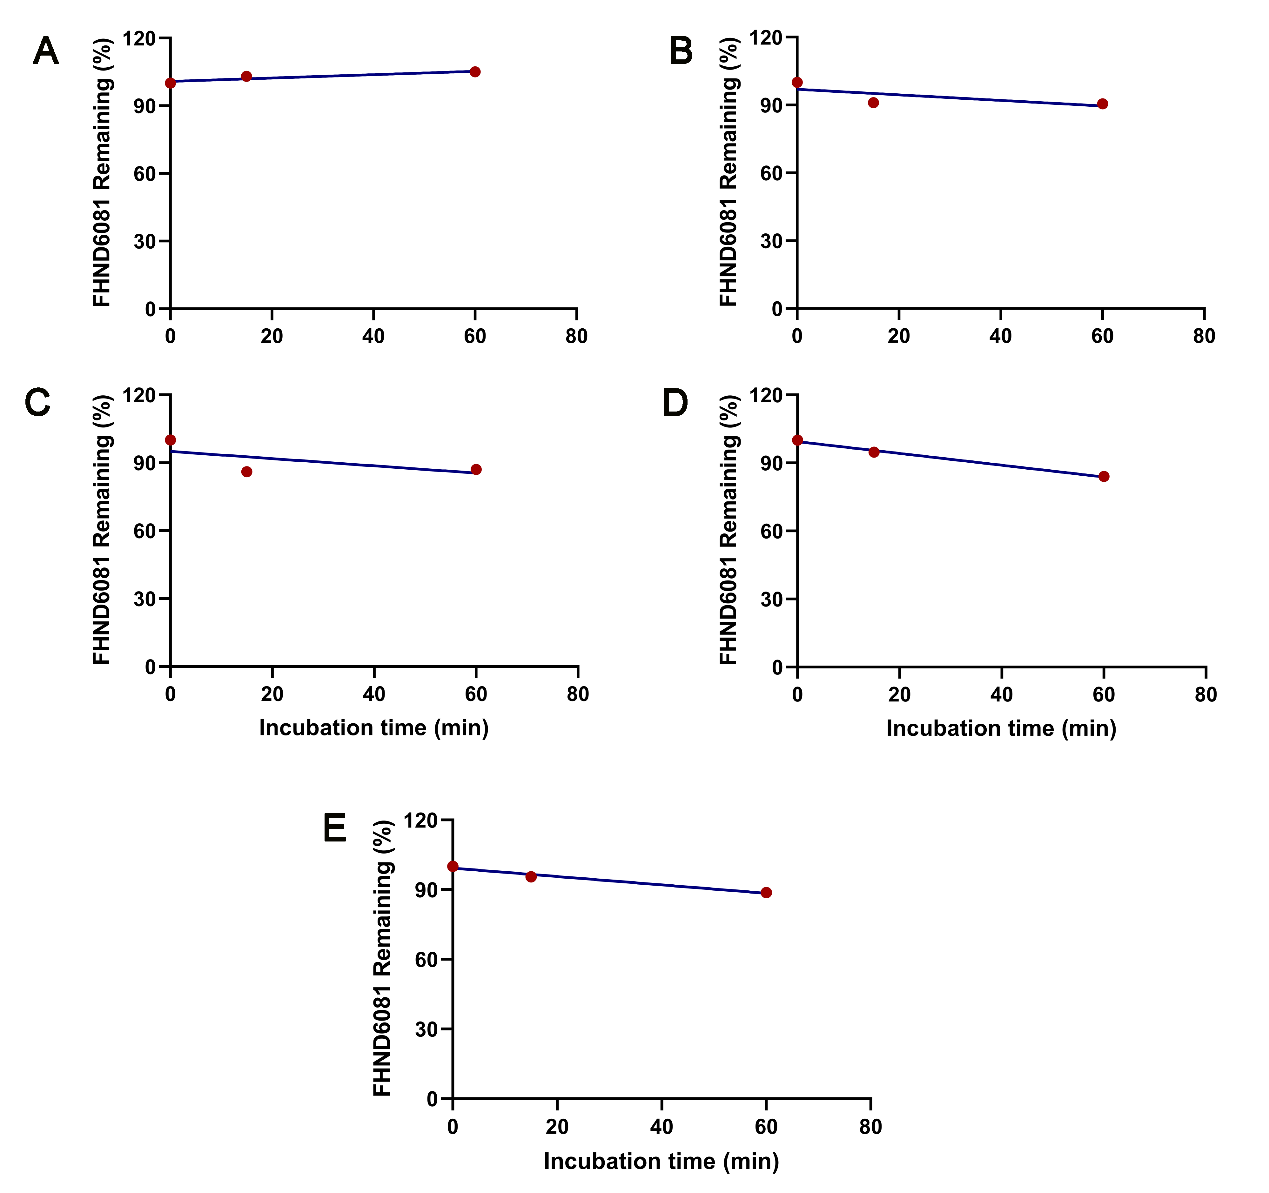
**

**Supplementary Figure 2.** Concentration-time curves of FHND6081 after FHDN6081 incubation with heat-inactivated (A) human, (B) monkey, (C) dog, (D) rat and (E) mouse liver microsomes.

**Supplementary Tables**

**Supplementary Table 1.** The plasma pharmacokinetic parameters of FHND6081 after single intravenous injection of FHND6091 in rats (n=6)

| Parameters | Rat (Mean ± SD) |
| --- | --- |
| 0.15 mg/kg |
| AUC0-t (ng·h/mL) | 323 ± 54 |
| AUC0-∞ (ng·h/mL) | 558 ± 181 |
| MRT0-∞ (h) | 28.74 ± 12.47 |
| t1/2 (h) | 24.14 ± 11.11 |
| VSS (L/kg) | 7.51 ± 1.91 |
| CL (mL/min/kg) | 4.93 ± 1.7 |
